# Supplementary material for: Systematic review of the predictive effect of MSI status in colorectal cancer patients undergoing 5FU-based chemotherapy
Source: BMC Cancer. 2015 Mar 21;15:156. doi: 10.1186/s12885-015-1093-4 (PMC4376504; doi:10.1186/s12885-015-1093-4)

Supplemental Material: Forest plot of response rate ratio (RR) for the effect of MSI status on response to treatment among patients treated with 5FU therapy. By convention, ratios less than 1.0 indicate a better response to treatment among patients with MSI-L/S status.

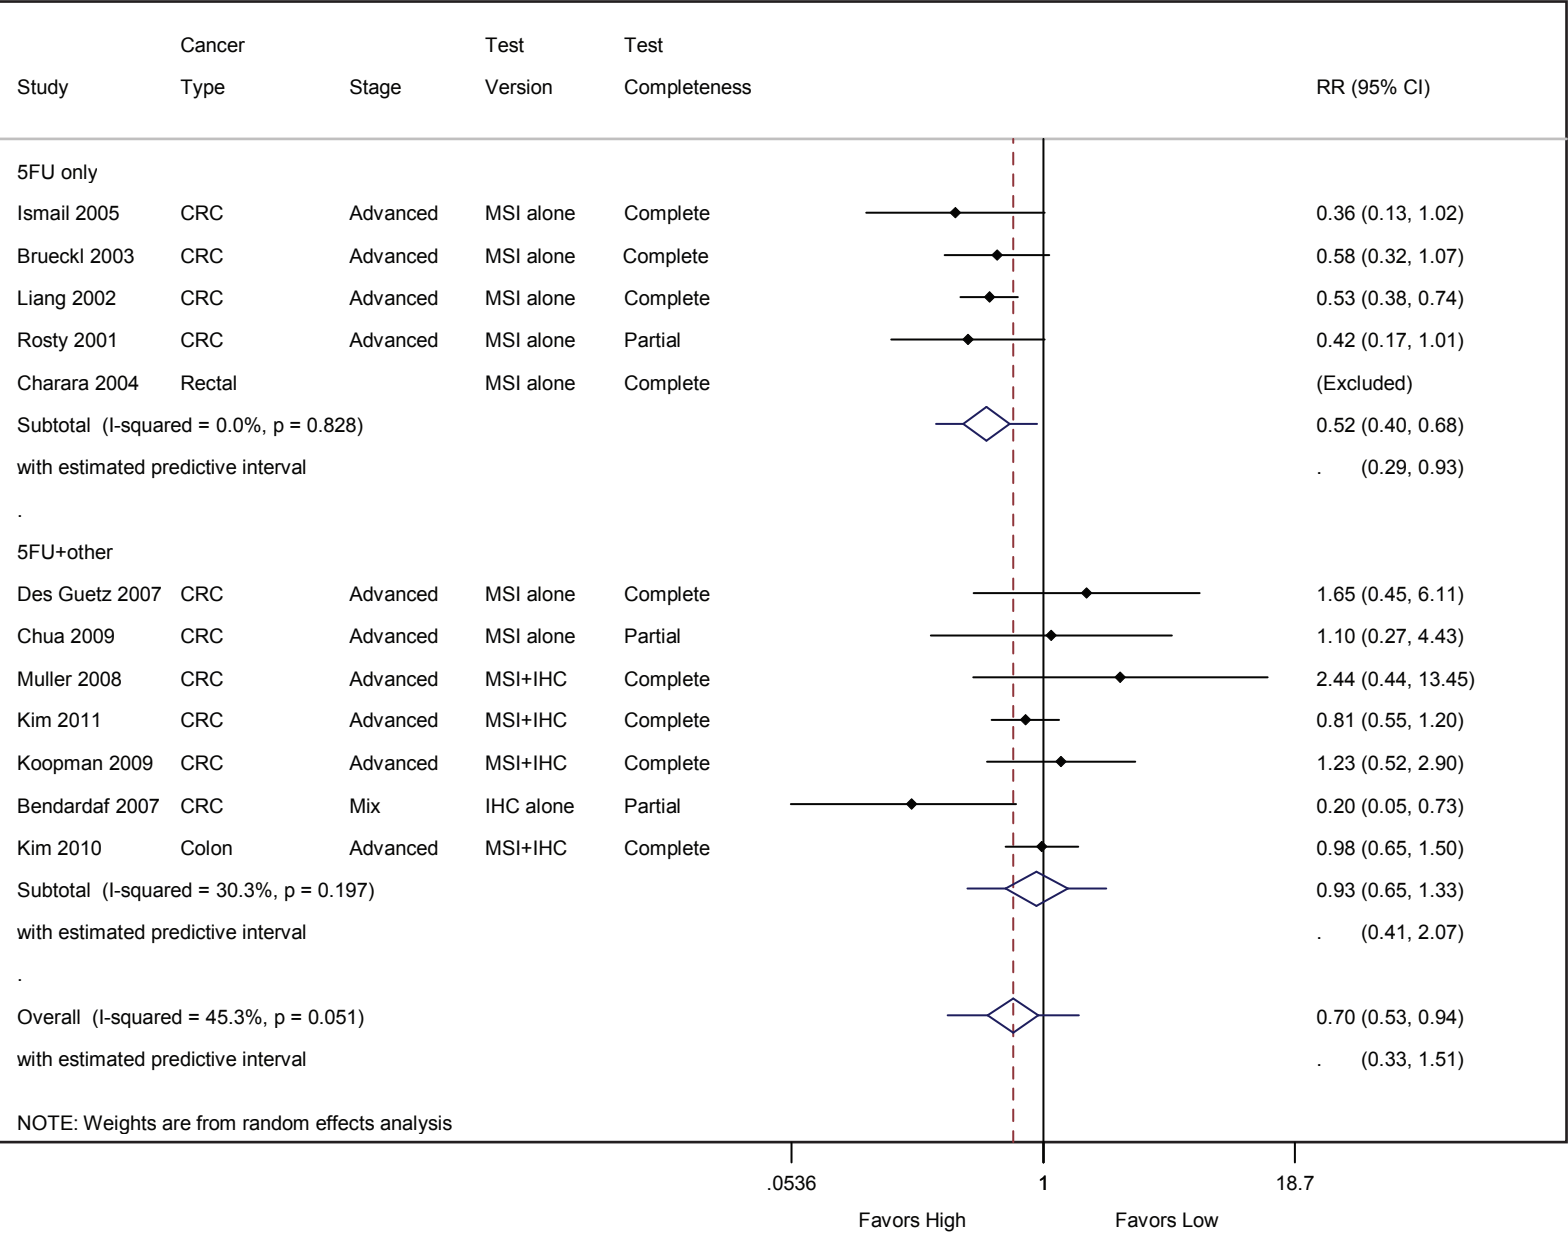

Supplement: Additional file 4: Figure S3. — Forest plot of response rate ratio (RR) for the effect of MSI status on response to treatment among patients treated with 5FU therapy. By convention, ratios less than 1.0 indicate a better response to treatment among patients with MSI-L/S status. [file 12885_2015_1093_MOESM4_ESM.pdf]
